# Supplementary material
Source: PubMed Central journal article supplement (PMC9050964)
Supplement: NIHMS1746398-supplement-Supplemental_Data_File___doc___tif__pdf__etc___1.pdf [file NIHMS1746398-supplement-Supplemental_Data_File___doc___tif__pdf__etc___1.pdf]

## Supplement: Marathon Survey

- 1) What is your study/sticker number? \_\_\_\_\_
- 2) What is your gender?
  - Male
  - Female
  - Prefer Not to Say
  - Other: \_\_\_\_\_
- 3) What is your age? \_\_\_\_\_
- 4) What is your race/ethnicity? Choose all that apply.
  - Caucasian/White
  - African American/Black
  - Hispanic/Latino
  - Asian/Pacific Islander
  - Other
- 5) What is your height (ft, inches): \_\_\_\_\_
- 6) What is your weight (from last time measured in lbs): \_\_\_\_\_
- 7) Do you have a hydration plan for the marathon?
  - Yes
  - Maybe
  - No
- 8) What resources affect your hydration plan? Check all choices that apply.
  - Prior experience
  - Books, magazines
  - Scientific research, journals
  - Commercials/Ads
  - Online/Internet search
  - YouTube
  - Word of Mouth, other runners
  - Coach
  - Other: \_\_\_\_\_
- 9) What are you going to drink? Check all choices that apply.
  - Sports drinks (Gatorade, powerade)
  - 100% water
  - Water with added electrolyte supplements (i.e. nuun, GU powder)
  - Coconut water
  - Other: \_\_\_\_\_
- 10) How much fluid will you drink **before** the race? i.e. water-loading
  - 0
  - <16oz/0.5L
  - 16oz/0.5L to 32oz/1L
  - 32oz/1L to 64oz/2L
  - 64oz/2L to 100oz/3L
  - 100oz/3L to 135oz/4L
  - >135oz/4L
  - Don't know
- 11) **How often** are you planning to drink fluids **during** the race?
  - Every mile/station
  - Every other mile
  - Every third mile or less often
  - Other: \_\_\_\_\_

12) **Total** amount of fluids you plan to consume **during** the race?

- 0
- <16oz/0.5L
- 16oz/0.5L to 32oz/1L
- 32oz/1L to 64oz/2L
- 64oz/2L to 100oz/3L
- 100oz/3L to 135oz/4L
- >135oz/4L
- Don't know

13) How do you check your hydration status? Check all choices that apply.

- Thirsty
- Urine Color
- Skin changes
- How I feel
- No idea/don't know
- Other: \_\_\_\_\_

14) Is there a **minimum** amount of fluids you think a marathon runner should drink during a race?

- 0
- <16oz/0.5L
- 16oz/0.5L to 32oz/1L
- 32oz/1L to 64oz/2L
- 64oz/2L to 100oz/3L
- 100oz/3L to 135oz/4L
- >135oz/4L
- Don't know

15) Is there a **maximum** amount of fluids you think a marathon runner should drink during a race?

- 0
- <16oz/0.5L
- 16oz/0.5L to 32oz/1L
- 32oz/1L to 64oz/2L
- 64oz/2L to 100oz/3L
- 100oz/3L to 135oz/4L
- >135oz/4L
- Don't know

16) How many races have you run in the past? Please fill in the table with 0 or the appropriate number.

|                            |  |
|----------------------------|--|
| # Marathons (26.2 mi)      |  |
| # Half-Marathons (13.1 mi) |  |
| #10K (6.2 mi)              |  |
| #5K (3.1 mi)               |  |
| # ultramarathon (>26.2 mi) |  |
| # other races              |  |

17) How long have you been training for this marathon? \_\_\_\_\_

18) What is your focus as a runner? Check all choices that apply.

- Fun
- Fitness
- Charity
- Recreational Racing
- Competition

- 19) Do you have any of the following medical conditions? Check all choices that apply.
- None
  - Diabetes
  - High Blood Pressure
  - Joint Pains (knee/back included), Arthritis
  - Asthma or COPD
- 20) Do you currently have any injuries?
- Yes
  - No
- 21) How many times have you taken a standard dose of NSAIDs (Advil/Ibuprofen, Aleve, Celebrex, Aspirin) in the **past 7 days**? \_\_\_\_\_ times
- 22) Are you currently taking any medications? If yes, please list them \_\_\_\_\_
- 23) Are you taking any supplements? If yes, please list them: \_\_\_\_\_
- 24) What are you eating during the race? Check all choices that apply
- Nothing
  - Gels/Gus
  - Bars
  - Other: \_\_\_\_\_
- 25) Will you have coffee or any form of caffeine before the race?
- Yes
  - Maybe
  - No
- 26) How many drinks of alcohol have you had in the past 7 days?
- 0
  - 1-7 in the past 7 days
  - 7-14 in the past 7 days
  - >14 in the past 7 days
- 27) Are you part of a running club or team?
- Yes
  - No
- 28) Have you consulted a physician about your plans to race a marathon?
- Yes
  - No
- 29) Have you heard of water intoxication, water overload or hyponatremia before?
- Yes
  - No
  - Not sure
- 30) If you get hyponatremia/water intoxication/water overload, what symptoms do you expect by the end of the race?
- Symptoms: \_\_\_\_\_
  - Don't know
- 31) How do you avoid hyponatremia/water intoxication/water overload?
- \_\_\_\_\_
  - Don't know
- 32) Have you heard of dehydration/drinking too little water before?
- Yes
  - No
  - Not sure

33) If you get dehydration, what symptoms do you expect by the end of the race?

- Symptoms: \_\_\_\_\_
- Don't know

34) How do you avoid dehydration?

- \_\_\_\_\_
- Don't know
